# Supplementary material
Source: Springer Nature journal article supplement (https://www.springermedizin.de/resource/supplementary/12884_2009_291_MOESM5_ESM.pdf/9457386)

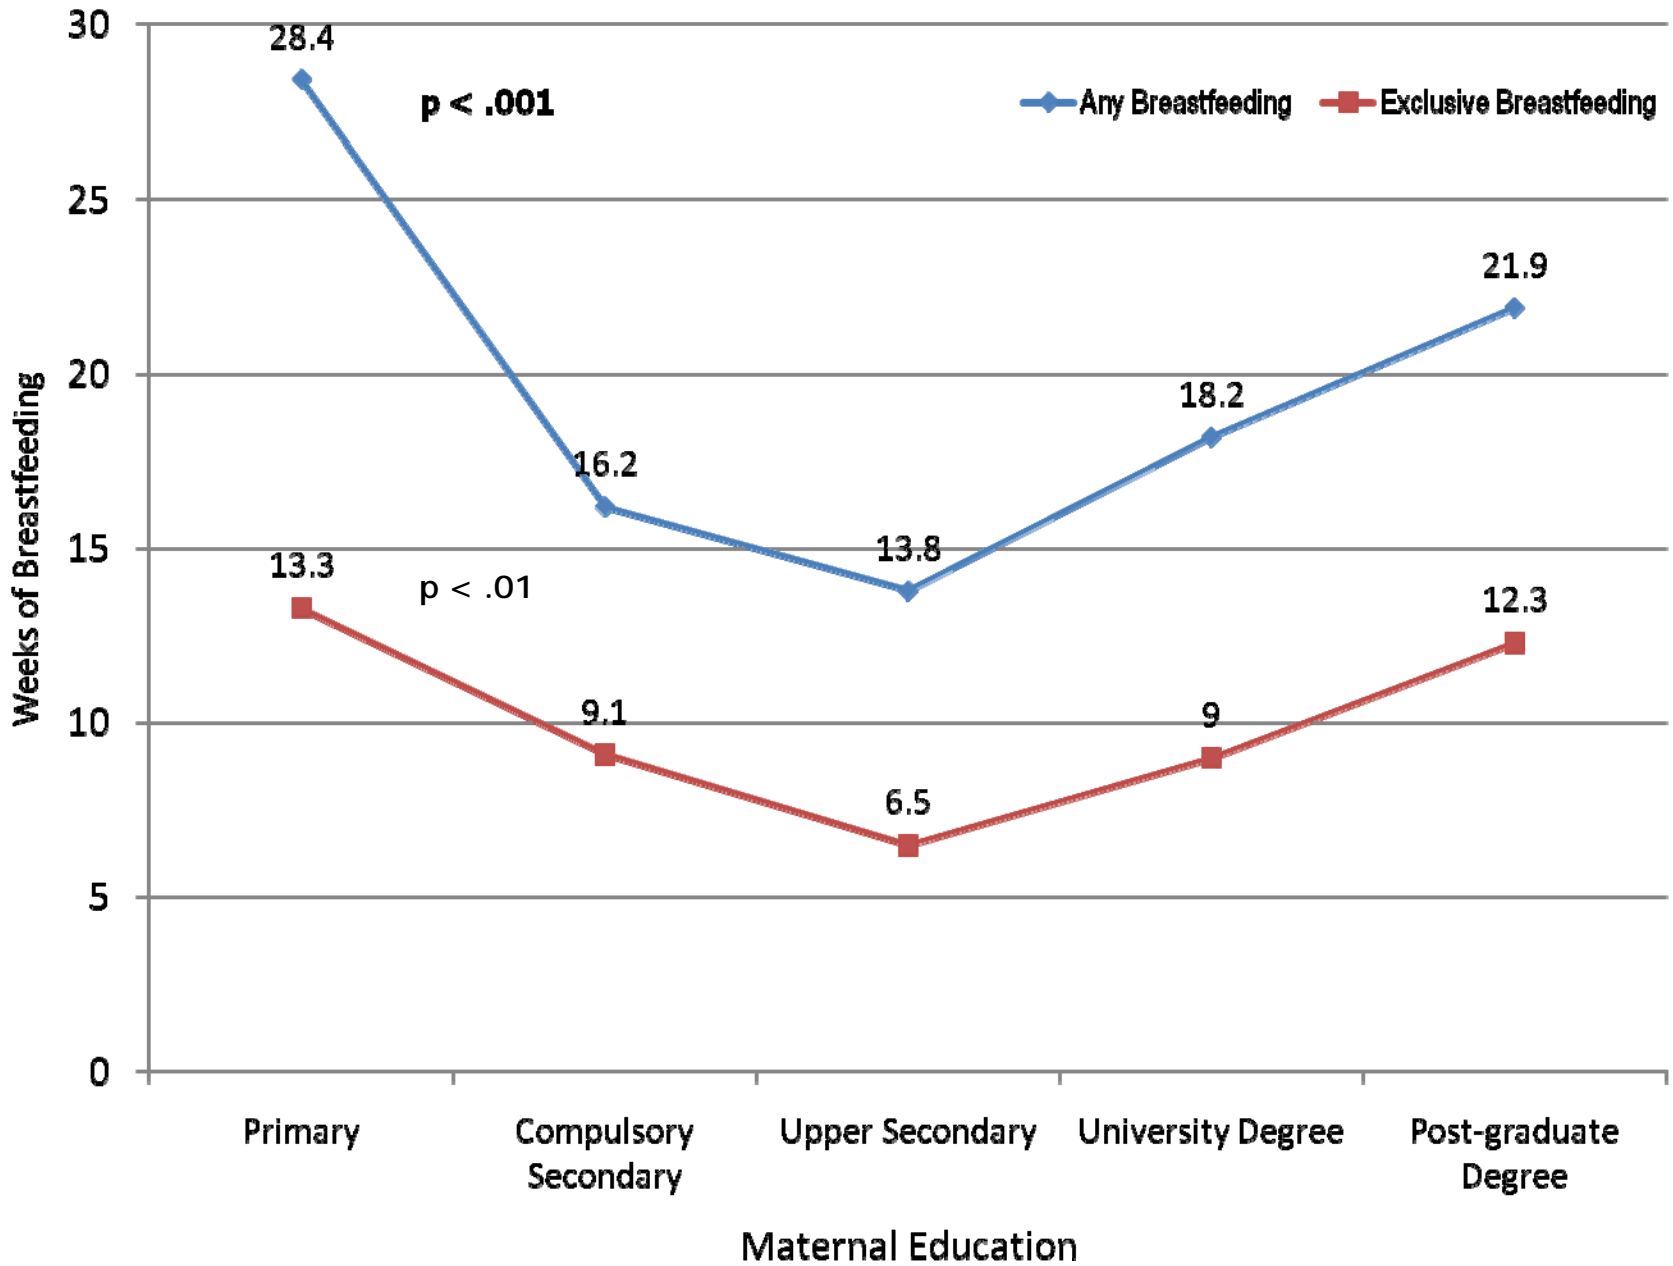

Supplement: MOESM5 [file 9457386]
